# Supplementary material for: The Differences and Similarities between Allergists and Non-Allergists for Penicillin Allergy Management
Source: PubMed Central journal article supplement (PMC3953625; doi:10.1155/2014/214183), 2014-02-24
Supplement: 214183.f1.pdf [file 214183.f1.pdf]

## **Appendix A.**

### **Survey questionnaire about penicillin allergy management**

(Select one best answer in the following clinical scenario questions : MPE = maculopapular exanthema, DRESS = drug reaction with eosinophilia and systemic symptoms, SJS = Stevens-Johnson syndrome)

- Preferred management in patients with a history of penicillin-induced urticaria/angioedema when penicillin is indicated in the presence and absence of penicillin skin test reagent
  - a) Perform penicillin skin test
  - b) Avoid penicillin
  - c) Avoid penicillin and cephalosporins
  - d) Perform penicillin graded challenge
  - e) Perform penicillin desensitization
  
- Preferred management in patients with a history of penicillin-induced anaphylaxis when penicillin is indicated in the presence and absence of penicillin skin test reagent
  - a) Perform penicillin skin test
  - b) Avoid penicillin
  - c) Avoid penicillin and cephalosporins
  - d) Perform penicillin graded challenge
  - e) Perform penicillin desensitization
  
- Preferred management in patients with a history of penicillin-induced an immediate reaction when penicillin is indicated according to positive and negative penicillin skin test results
  - a) Prescribe penicillin normally

- b) Avoid penicillin
  - c) Avoid penicillin and cephalosporins
  - d) Perform penicillin graded challenge
  - e) Perform penicillin desensitization
- Preferred management in patients with a history of penicillin-induced non-immediate reactions (MPE, DRESS, or SJS) when penicillin is indicated
    - a) Avoid penicillin only
    - b) Avoid penicillin and cephalosporins
    - c) Perform penicillin graded challenge
    - d) Perform penicillin desensitization
- Prescription of the following antibiotics in patients with unconfirmed allergic reaction to penicillin
 

|                                                                |                                              |
|----------------------------------------------------------------|----------------------------------------------|
| 1. Aminopenicillins                                            | 2. Cloxa/dicloxacillin                       |
| 3. 1 <sup>st</sup> generation cephalosporins                   | 4. 2 <sup>nd</sup> generation cephalosporins |
| 5. 3 <sup>rd</sup> & 4 <sup>th</sup> generation cephalosporins | 6. Carbapenem                                |
| 7. Monobactam                                                  |                                              |

    - a) Complete avoidance
    - b) Prescribable with precaution
    - c) Prescribable
- The recommended penicillin skin test reagent (s) for the confirmation of patients with a history of an immediate reaction to penicillin
    - a) Freshly prepared penicillin G solution

- b) Aged penicillin G solution
  - c) Penicilloyl-polylysine
  - d) Minor determinant mixtures
  - e) Penicilloyl-polylysine + minor determinant mixtures [correct answer]
- 
- How to correctly interpret penicillin skin test as a positive intradermal test?
    - a) Final wheal diameter at least 5 mm
    - b) Final wheal diameter at least 2 times larger than negative (normal saline) control
    - c) Final wheal diameter at least 2 times larger than the initial size
    - d) Final wheal diameter increase at least 3 mm larger than the initial size [correct answer]
- 
- The estimated actual allergic rate in patients with a history of penicillin allergy
    - a) 0-20%
    - b) 20-40%
    - c) 40-60%
    - d) 60-80%
    - e) 80-100%
- 
- Main reason for using alternative antibiotics without confirming penicillin allergic status in patients with a suspected history
    - a) Convincing history
    - b) No available diagnostic tests
    - c) Patient preference

- d) Availability of alternative drugs
  - e) Medico-legal issue
- 
- Your opinion for the management of patients with a history of penicillin-induced immediate reaction in Thailand
    - a) Avoid penicillin
    - b) Perform penicillin skin test
    - c) Measure penicillin-specific IgE
    - d) Perform penicillin graded challenge

## Appendix B.

**P values of univariate and multivariate analysis of factors affecting penicillin allergy management among Thai physicians in different scenarios (NS = not significant)**

| Scenarios of penicillin allergy management               | Areas of expertise |              | Medical practice settings |              | Medical practice duration |              |
|----------------------------------------------------------|--------------------|--------------|---------------------------|--------------|---------------------------|--------------|
|                                                          | Univariate         | Multivariate | Univariate                | Multivariate | Univariate                | Multivariate |
| 1. Immediate reactions (mild)<br>Unavailable skin test   | 0.28               | NS           | 0.66                      | NS           | 0.66                      | NS           |
| 2. Immediate reactions (severe)<br>Unavailable skin test | < 0.01             | < 0.01       | 0.12                      | NS           | 0.94                      | NS           |
| 3. Immediate reaction (mild)<br>Available skin test      | < 0.01             | < 0.01       | 0.51                      | NS           | < 0.01                    | NS           |
| 4. Immediate reaction (severe)<br>Available skin test    | < 0.01             | < 0.01       | 0.30                      | NS           | < 0.01                    | NS           |
| 5. Immediate reactions<br>Positive skin test             | 0.12               | NS           | 0.26                      | NS           | 0.38                      | NS           |
| 6. Immediate reactions<br>Negative skin test             | < 0.01             | < 0.01       | 0.21                      | NS           | 0.03                      | NS           |
| 7. MPE                                                   | 0.17               | NS           | 0.38                      | NS           | 0.23                      | NS           |
| 8. DRESS                                                 | 0.17               | NS           | 0.30                      | NS           | < 0.01                    | < 0.01       |

|                                                                       |                  |                  |                  |    |                  |             |
|-----------------------------------------------------------------------|------------------|------------------|------------------|----|------------------|-------------|
| 9. SJS                                                                | <b>0.05</b>      | <b>0.05</b>      | 0.19             | NS | 0.18             | NS          |
| 10. Aminopenicillin                                                   | 0.19             | NS               | 0.62             | NS | 0.21             | NS          |
| 11. Cloxa/dicloxacillin                                               | 0.50             | NS               | 0.83             | NS | 0.59             | NS          |
| 12. 1 <sup>st</sup> gen cephalosporin                                 | <b>0.03</b>      | <b>0.03</b>      | <b>0.05</b>      | NS | <b>0.03</b>      | NS          |
| 13. 2 <sup>nd</sup> gen cephalosporin                                 | 0.95             | NS               | 0.75             | NS | 0.65             | NS          |
| 14. 3 <sup>rd</sup> / 4 <sup>th</sup> gen cephalosporin               | <b>0.01</b>      | <b>0.02</b>      | 0.10             | NS | 0.50             | NS          |
| 15. Carbapenem                                                        | 0.19             | NS               | <b>0.04</b>      | NS | <b>0.09</b>      | NS          |
| 16. Monobactam                                                        | 0.35             | NS               | <b>0.08</b>      | NS | 0.40             | NS          |
| 17. Correct test reagents                                             | <b>&lt; 0.01</b> | <b>&lt; 0.01</b> | <b>&lt; 0.01</b> | NS | <b>&lt; 0.01</b> | NS          |
| 18. Correct interpretation                                            | <b>&lt; 0.01</b> | <b>&lt; 0.01</b> | <b>&lt; 0.01</b> | NS | 0.17             | NS          |
| 19. Reasons for use alternative drugs without confirm allergic status | 0.47             | NS               | 0.99             | NS | 0.08             | NS          |
| 21. Preferred recommendation                                          | <b>&lt; 0.01</b> | <b>&lt; 0.01</b> | 0.33             | NS | <b>&lt; 0.01</b> | <b>0.02</b> |
